# Supplementary material for: Development and Validation of Osteoporosis Risk-Assessment Model for Korean Men
Source: PubMed Central journal article supplement — Yonsei Med J. 2015 Nov 30;57(1):187–96. doi: 10.3349/ymj.2016.57.1.187 (PMC4696952; doi:10.3349/ymj.2016.57.1.187), 2015-11-30
Supplement: ymj-57-187-s001.pdf [file ymj-57-187-s001.pdf]

**Supplementary Table 1.** Performance of the KORAM-M to Predict Osteoporosis According to Risk Category by Age

| Risk category         | Development dataset |                         | Validation dataset  |                         |
|-----------------------|---------------------|-------------------------|---------------------|-------------------------|
|                       | Total, n (column %) | Osteoporosis, n (row %) | Total, n (column %) | Osteoporosis, n (row %) |
| <b>&lt;70 yrs</b>     |                     |                         |                     |                         |
| High (<-27)           | 6 (0.6)             | 4 (66.7)                | 8 (1.0)             | 3 (37.5)                |
| Intermediate (-27--9) | 483 (48.9)          | 38 (7.9)                | 438 (53.1)          | 35 (8.0)                |
| Low (>-9)             | 499 (50.5)          | 10 (2.0)                | 379 (45.9)          | 11 (2.9)                |
| Total                 | 988 (100.0)         | 52 (5.3)                | 825 (100.0)         | 49 (5.9)                |
| <b>≥70 yrs</b>        |                     |                         |                     |                         |
| High (<-27)           | 50 (14.2)           | 22 (44.0)               | 16 (5.6)            | 9 (56.3)                |
| Intermediate (-27--9) | 269 (76.4)          | 35 (13.0)               | 232 (81.4)          | 33 (14.2)               |
| Low (>-9)             | 33 (9.4)            | 0 (0.0)                 | 37 (13.0)           | 0 (0.0)                 |
| Total                 | 352 (100.0)         | 57 (16.2)               | 285 (100.0)         | 42 (14.7)               |

KORAM-M, Korean Osteoporosis Risk-Assessment Model for Men.
