# Supplementary material for: Development and Validation of Osteoporosis Risk-Assessment Model for Korean Men
Source: PubMed Central journal article supplement — Yonsei Med J. 2015 Nov 30;57(1):187–96. doi: 10.3349/ymj.2016.57.1.187 (PMC4696952; doi:10.3349/ymj.2016.57.1.187), 2015-11-30
Supplement: ymj-57-187-s002.pdf [file ymj-57-187-s002.pdf]

**Supplementary Table 2.** Comparison between the Current NHIC Guideline and the KORAM-M by Age

|                                             | <b>NHIC guideline (%)</b> | <b>KORAM-M (%)</b> |
|---------------------------------------------|---------------------------|--------------------|
| <b>&lt;70 yrs</b>                           |                           |                    |
| No. of subjects recommended for DXA testing | 21/988 (2.1)              | 489/988 (49.5)     |
| Sensitivity                                 | 9/52 (17.3)               | 42/52 (80.8)       |
| Specificity                                 | 924/936 (98.7)            | 489/936 (52.2)     |
| Positive predictive value                   | 9/21 (42.9)               | 42/489 (8.6)       |
| Negative predictive value                   | 924/967 (95.6)            | 489/498 (98.2)     |
| False negative rate                         | 43/52 (82.7)              | 10/52 (19.2)       |
| False positive rate                         | 12/936 (1.3)              | 447/936 (47.8)     |
| <b>≥70 yrs</b>                              |                           |                    |
| No. of subjects recommended for DXA testing | 352/352 (100.0)           | 319/352 (90.6)     |
| Sensitivity                                 | 57/57 (100.0)             | 57/57 (100.0)      |
| Specificity                                 | 0/295 (0.0)               | 33/295 (11.2)      |
| Positive predictive value                   | 57/352 (16.2)             | 57/319 (17.9)      |
| Negative predictive value                   | 0/0 (-)                   | 33/33 (100.0)      |
| False negative rate                         | 0/57 (0.0)                | 0/57 (0.0)         |
| False positive rate                         | 295/295 (100.0)           | 262/295 (88.8)     |

NHIC, National Health Insurance Corporation; KORAM-M, Korean Osteoporosis Risk-Assessment Model for Men; DXA, dual-energy X-ray absorptiometry.
